# Supplementary figures and images for: Interface leakage during neonatal CPAP treatment: a randomised, cross-over trial
Source: HighWire-hosted journal article supplement (doi:10.1136/archdischild-2021-321579), 2021-05-07

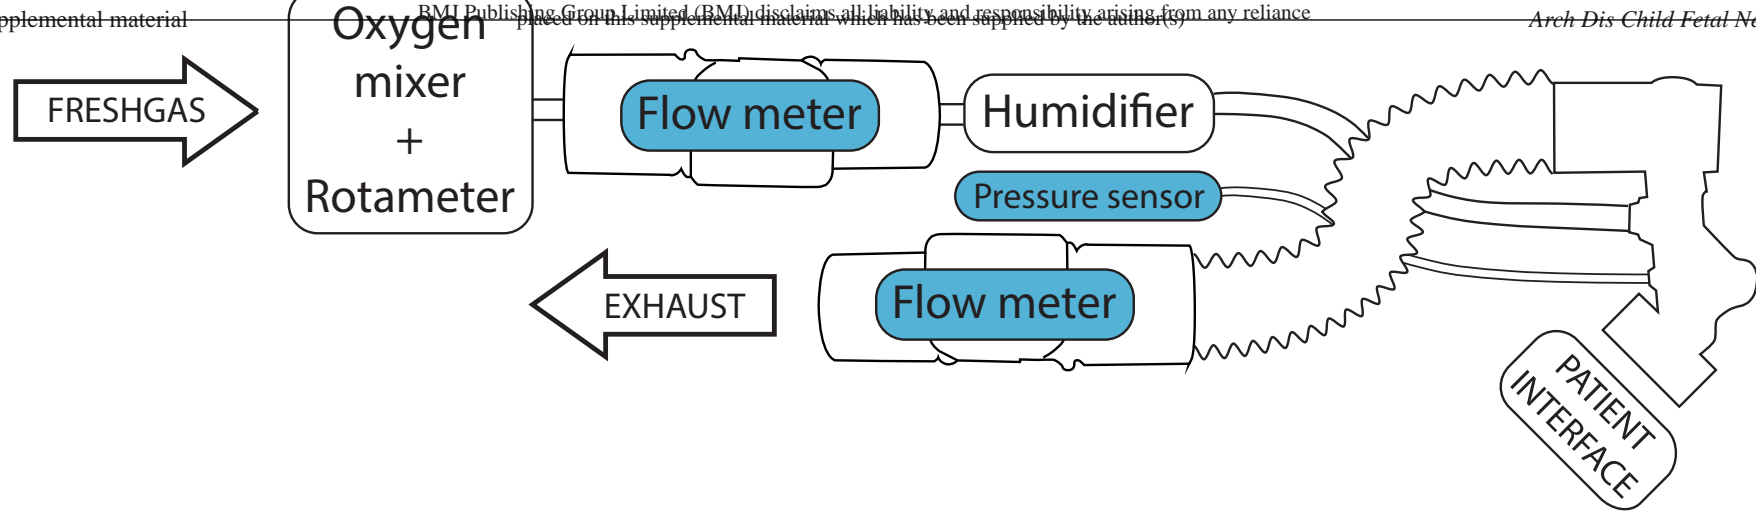

Supplement: archdischild-2021-321579supp001_data_supplement.pdf [file archdischild-2021-321579supp001_data_supplement.pdf]
